# Supplementary material for: Cancer Spectrum, Family History of Cancer and Overall Survival in Men with Germline BRCA1 or BRCA2 Mutations
Source: MDPI journal article supplement (doi:10.3390/jpm11090917), 2021-09-15
Supplement: s1 [file s1]

**Supplementary Table S1.** Characteristics of patients with two breast cancer diagnoses.

|                   | Patient 1      | Patient 2   | Patient 3  | Patient 4  |
|-------------------|----------------|-------------|------------|------------|
| Mutation          | BRCA2          | BRCA2       | BRCA2      | BRCA2      |
| Mutation-Type     | Frameshift     | Splice Site | Missense   | Frameshift |
| Mutation-Location | c.3847_3848del | c.7617+2T>G | c.9371A>T  | c.5544delT |
| Family history    |                |             |            |            |
| FDR with BC       | 1              | 0           | 2          | 0          |
| SDR with BC       | 0              | 0           | 0          | 0          |
| Year of diagnosis | 1996           | 1974        | 2011       | 2008       |
| Age at diagnosis  |                |             |            |            |
| First BC          | 60             | 42          | 68         | 59         |
| Second BC         | 65             | 77          | 76         | 61         |
| Laterality        |                |             |            |            |
| First BC          | unilateral     | unilateral  | unilateral | unilateral |
| Second BC         | unilateral     | unilateral  | unilateral | n.a        |
| Side affected     |                |             |            |            |
| First BC          | left           | left        | left       | right      |
| Second BC         | right          | right       | right      | n.a.       |
| Behavior          |                |             |            |            |
| First BC          | n.a.           | n.a.        | invasive   | invasive   |
| Second BC         | invasive       | invasive    | invasive   | n.a.       |
| Morphology        |                |             |            |            |
| First BC          | n.a.           | n.a.        | ductal     | ductal     |
| Second BC         | ductal         | ductal      | ductal     | n.a.       |
| Grade             |                |             |            |            |
| First BC          | n.a.           | n.a.        | G2         | G3         |
| Second BC         | G2             | G3          | G3         | n.a.       |
| Tumor size        |                |             |            |            |
| First BC          | T2             | n.a.        | T2         | n.a.       |
| Second BC         | T1             | T2          | T2         | n.a.       |
| Node status       |                |             |            |            |
| First BC          | N1             | n.a.        | N0         | n.a.       |
| Second BC         | N0             | N3          | N0         | n.a.       |
| Metastases        |                |             |            |            |
| First BC          | M0             | M0          | M0         | M1 (Brain) |
| Second BC         | M1 (Bone)      | M1 (Liver)  | M0         | n.a.       |
| ER status         |                |             |            |            |
| First BC          | n.a.           | n.a.        | positive   | positive   |
| Second BC         | positive       | positive    | positive   | n.a.       |
| PR status         |                |             |            |            |
| First BC          | n.a.           | n.a.        | positive   | negative   |
| Second BC         | positive       | positive    | positive   | n.a.       |
| HER2 status       |                |             |            |            |
| First BC          | n.a.           | n.a.        | positive   | n.a.       |
| Second BC         | n.a.           | positive    | negative   | n.a.       |
| Ki-67             |                |             |            |            |
| First BC          | n.a.           | n.a.        | n.a.       | n.a.       |
| Second BC         | n.a.           | 40          | n.a.       | n.a.       |

| Type of surgery |                                                            |                                                  |                             |                             |
|-----------------|------------------------------------------------------------|--------------------------------------------------|-----------------------------|-----------------------------|
| First BC        | Modified radical mastectomy                                | Modified radical mastectomy                      | Modified radical mastectomy | Modified radical mastectomy |
| Second BC       | Modified radical mastectomy                                | Modified radical mastectomy                      | Modified radical mastectomy | n.a.                        |
| Age at Death    | 76                                                         | 81                                               | Alive                       | Alive                       |
| Cause of Death  | Generalized metastatic spread - <b>Breast Cancer C50.9</b> | Cardiac arrest due to <b>Breast Cancer C50.9</b> | -                           | -                           |

**Abbreviations** FDR first-degree relative(s); SDR second-degree relative(s); BC breast cancer; n.a. not available; ER estrogen receptor; PR progesterone receptor; HER2 receptor human epidermal growth factor receptor2.
